# Supplementary material
Source: HighWire-hosted journal article supplement (https://jnm.snmjournals.org/highwire/filestream/94450/field_highwire_adjunct_files/0/116426_Supplemental_Data.pdf)

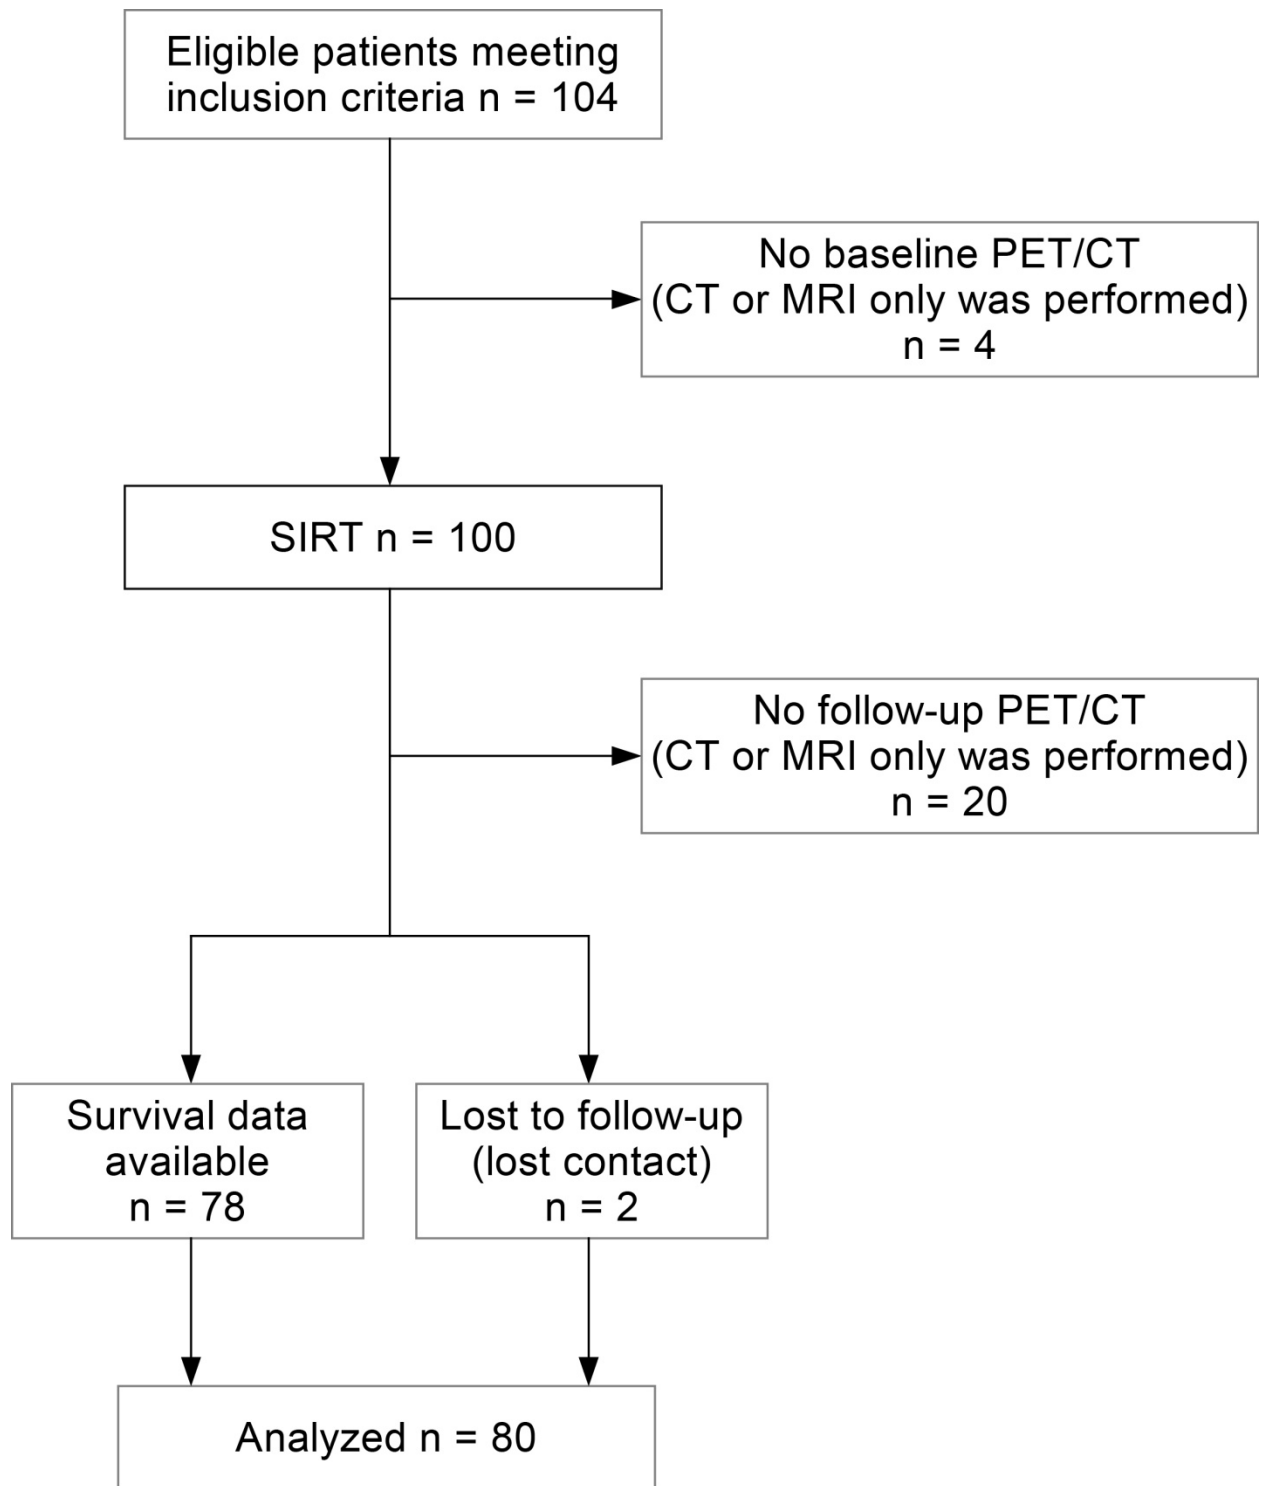

**Supplemental Figure 1. Flow diagram for patient selection. MRI = MR imaging.**

Supplement: 116426_Supplemental_Data.pdf [file 116426_Supplemental_Data.pdf]
